# Supplementary material for: RNA polymerase III transcribes human microRNAs
Source: Springer Nature journal article supplement (doi:10.1038/nsmb1167), 2006-11-12
Supplement: 41594_2006_BFnsmb1167_MOESM1_ESM.pdf [file 41594_2006_BFnsmb1167_MOESM1_ESM.pdf]

# RNA polymerase III

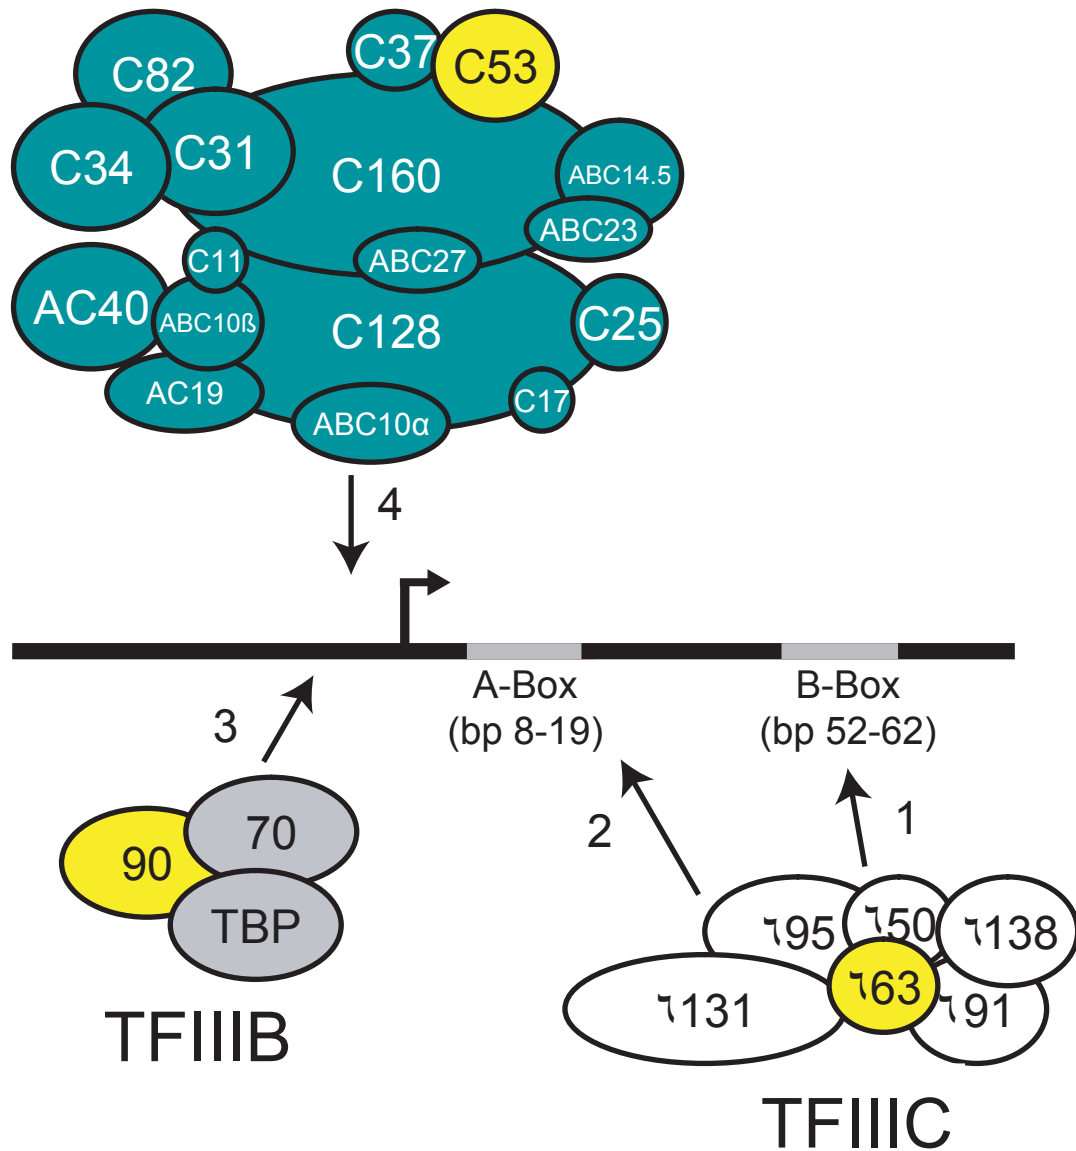

**Supplementary Figure 1.** Pol-III ChIP antibody specificity. Specific subunits recognized by ChIP antibodies have been highlighted (yellow). A- and B- boxes are initially recognized by the multisubunit complex, TFIIC. Once bound, TFIIC recruits the three subunit complex TFIIB whose promoter association signals the recruitment of RNA Pol-III. Primers for miR-515-l, -517a and -519a (**Supplementary Table 5** online) were used to ascertain the polymerase occupancy of representative miRNAs in the C19MC. Adapted from: [www.embl-grenoble.fr/groups/dna/rr02\\_94.pdf](http://www.embl-grenoble.fr/groups/dna/rr02_94.pdf)
