# Supplementary material for: RNA polymerase III transcribes human microRNAs
Source: Springer Nature journal article supplement (doi:10.1038/nsmb1167), 2006-11-12
Supplement: 41594_2006_BFnsmb1167_MOESM2_ESM.pdf [file 41594_2006_BFnsmb1167_MOESM2_ESM.pdf]

### **Supplementary Table 1.** Human miRNA loci identified as repetitive.

All currently annotated human miRNA loci (<http://microrna.sanger.ac.uk/sequences/index.shtml>), were screened against Repbase using Censor Server (<http://www.girinst.org/censor/>). Only mature miRNAs entirely contained within a Censor Server consensus repetitive element annotation have been reported. All repetitive elements (grey rectangles) occurring within 500 bp (5' and 3') have been included in the following scale diagrams for uniformity. The RepBase repetitive element annotations depicted in these diagrams are described immediately beneath each locus as "Element 1, Element 2, etc..." as they occur 5' to 3'. For clarity, all RepBase annotations for mammalian-wide interspersed repeats (MIRs) have been changed to "MWIRs". "Base Positions" refers to the basepairs occupied by a miRNA hairpin (in the current NCBI 36 assembly). All loci have been diagrammed with respect to the Watson strand and the orientation of internal elements indicated by position above (5' to 3') or below (3' to 5') the center line. Element base pair positions are in respect to the first nucleotide of the pre-miRNA (as occurring on the Watson strand).

### **Supplementary Table 1** footnotes:

<sup>a</sup> Previously described by Smalheiser, NR and VI Torvik.

<sup>b</sup> Annotated by ENSEMBL based on rno-miR-374.

<sup>c</sup> Annotated by ENSEMBL based on rno-miR-297

---

### References

1. E. Birney, *et al.*, *Ensembl.Nucleic Acids Res.* **34**, D556-D561 (2006)
2. Pavlicek, A., Kohany, O., Jurka, J. Repeat mining: basic tools for detection and analysis. In *Analytical tools for DNA, genes and genomes nuts and bolts.* (Markoff, A., ed). DNA Press, Eagleville (2005).
3. Jurka, J. *et. al.* Repbase Update, a database of eukaryotic repetitive elements. *Cytogenetic and Genome Research* **110**, 462-467 (2005). (description of new version of CENSOR)
4. Jurka, J. Repbase Update: a database and an electronic journal of repetitive elements. *Trends Genet.* **9**,418-420 (2000).
5. Smalheiser, NR and VI Torvik. "Mammalian microRNAs derived from genomic repeats." *Trends Genet.* **21**,322-6 (2005).

## miR-28<sup>a</sup>

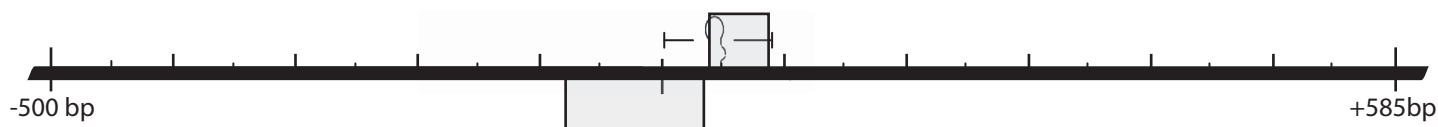

**Chromosomal Band:** 3q28  
**Base Positions:** 189889263-189889348  
**ENSEMBL Gene:** ENSG00000207651  
**Concurrent Transcripts:** LPP Intron

**Censor Server Annotations (bp 5' to 3') :**  
**Element 1:** LINE2B (-67 to +35)  
**Element 2:** LINE2B (+43 to +86)

## miR-95<sup>a</sup>

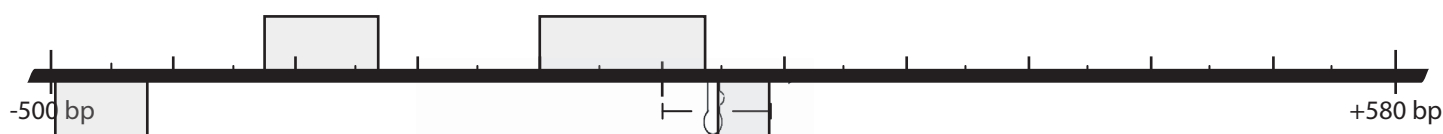

**Chromosomal Band:** 4p16.1  
**Base Positions:** 8057928-8058008  
**ENSEMBL Gene:** ENSG00000207807  
**Concurrent Transcripts:** ABLIM2 Intron

**Censor Server Annotations (bp 5' to 3') :**  
**Element 1:** MER20B (-496 to -424)  
**Element 2:** LINE2B (-327 to -239)  
**Element 3:** LINE2B (-101 to +35)  
**Element 4:** LINE2A (+48 to +80)

## miR-132

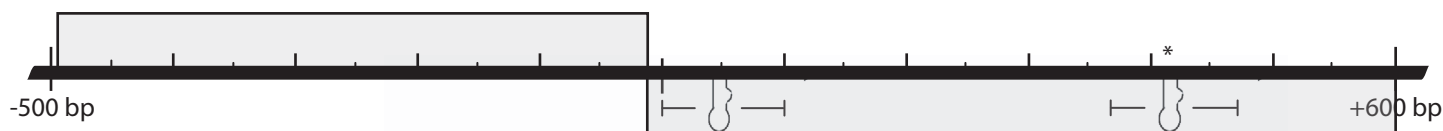

**Chromosomal Band:** 17p13.3  
**Base Positions:** 1899952-1900052  
**ENSEMBL Gene:** ENSG00000207724  
**Concurrent Transcripts:** \* miR-212

**Censor Server Annotations (bp 5' to 3') :**  
**Element 1:** MERMITEA (-491 to -9)  
**Element 2:** MERMITEA (-10 to +600)

## miR-212

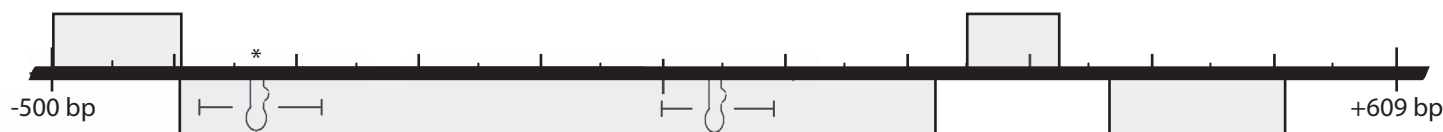

**Chromosomal Band:** 17p13.3  
**Base Positions:** 1900315-1900424  
**ENSEMBL Gene:** ENSG00000207953  
**Concurrent Transcripts:** \* miR-132

**Censor Server Annotations (bp 5' to 3') :**  
**Element 1:** MERMITEA (-500 to -395)  
**Element 2:** MERMITEA (-394 to +230)  
**Element 2:** Gypsy-9-I (+249 to +324)  
**Element 2:** RETROSAT2 (+365 to +507)

## miR-224

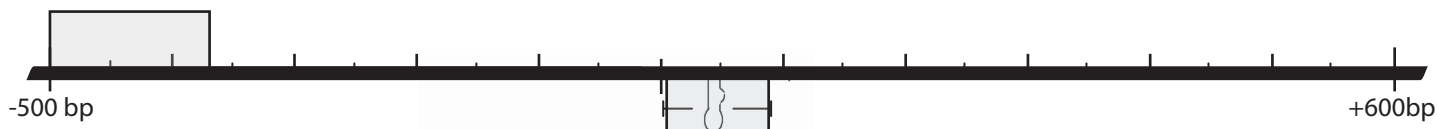

**Chromosomal Band:** Xq28  
**Base Positions:** 150877706-150877786  
**ENSEMBL Gene:** ENSG00000207621  
**Concurrent Transcripts:** GBRE Intron

**Censor Server Annotations (bp 5' to 3') :**  
**Element 1:** LINE3 (-500 to -370)  
**Element 2:** MER135 (+4 to +78)

## miR-325<sup>a</sup>

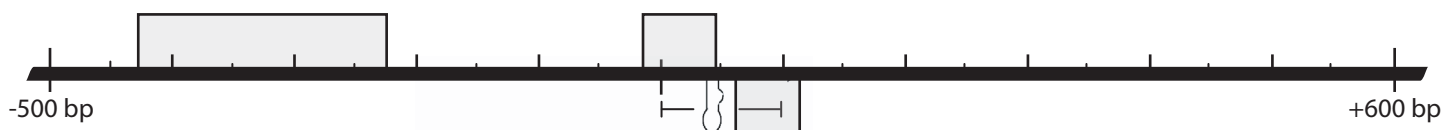

**Chromosomal Band:** Xq21.1  
**Base Positions:** 76142220-76142317  
**ENSEMBL Gene:** ENSG00000207995  
**Concurrent Transcripts:** n

**Censor Server Annotations (bp 5' to 3') :**  
**Element 1:** LINE2A (-436 to -221)  
**Element 2:** LINE2B (-13 to +45)  
**Element 3:** LINE2B (+57 to +110)

## miR-326

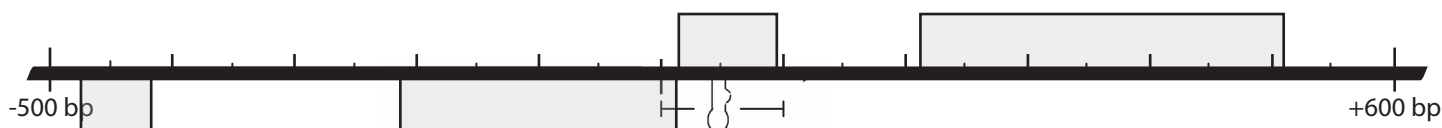

**Chromosomal Band:** 11q13.4  
**Base Positions:** 74723784-74723878  
**ENSEMBL Gene:** ENSG00000199090  
**Concurrent Transcripts:** ARRB1 Intron

**Censor Server Annotations (bp 5' to 3') :**  
**Element 1:** MWIRb (-472 to -413)  
**Element 2:** MER69 (-307 to +12)  
**Element 3:** SINEB2 (+14 to +99)  
**Element 4:** AluJo (+212 to +512)

## miR-340<sup>a</sup>

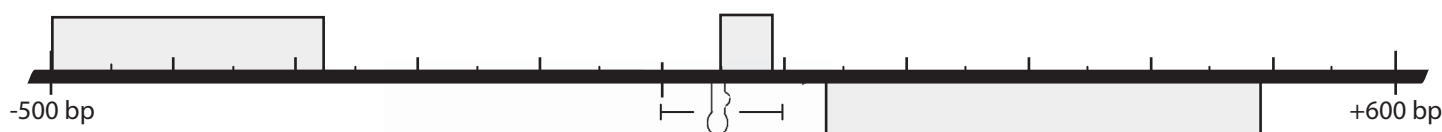

**Chromosomal Band:** 5q35.3  
**Base Positions:** 179374909-179375003  
**ENSEMBL Gene:** ENSG00000198995  
**Concurrent Transcripts:** RNF130 Intron

**Censor Server Annotations (bp 5' to 3') :**  
**Element 1:** AluJb (-500 to -291)  
**Element 2:** MARNA (+50 to +87)  
**Element 3:** ERV18 (+136 to +483)

## miR-374

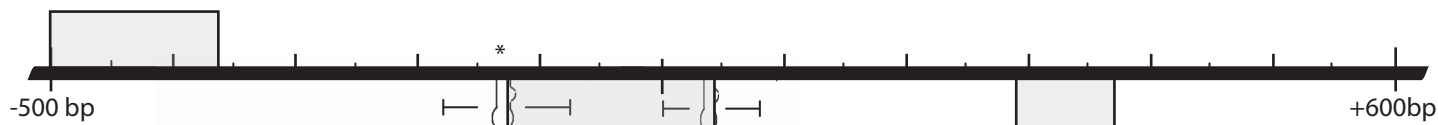

**Chromosomal Band:** Xq13.2  
**Base Positions:** 73423846-73423917  
**ENSEMBL Gene:** ENSG00000199168  
**Concurrent Transcripts:** \* miR-545, Hs.349570 Intron

**Censor Server Annotations (bp 5' to 3') :**  
**Element 1:** AluJo (-500 to -367)  
**Element 2:** LINE2A (-127 to +39)  
**Element 2:** LINE1 (+290 to +359)

## miR-545

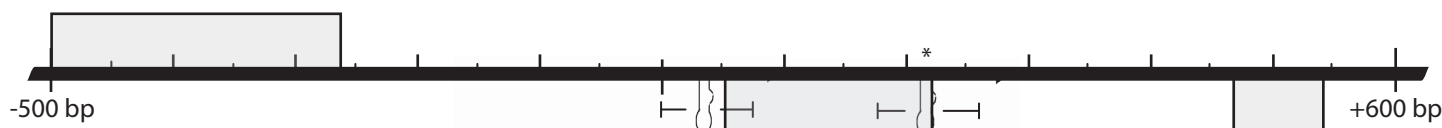

**Chromosomal Band:** Xq13.2  
**Base Positions:** 73423664-73423769  
**ENSEMBL Gene:** ENSG00000207820  
**Concurrent Transcripts:** \* miR-374, Hs.349570 Intron

**Censor Server Annotations (bp 5' to 3') :**  
**Element 1:** AluJo (-500 to -259)  
**Element 2:** LINE2A (+55 to +221)  
**Element 2:** LINE1 (+472 to +541)

## miR-378/miR-422b

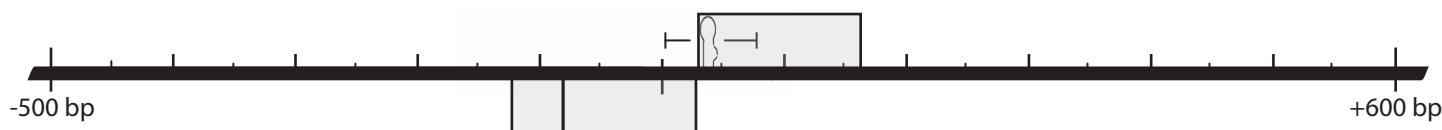

**Chromosomal Band:** 5q32  
**Base Positions:** ENSG00000199047  
**ENSEMBL Gene:** 149092581-149092646  
**Concurrent Transcripts:** PPARGC1B Intron

**Censor Server Annotations (bp 5' to 3') :**  
**Element 1:** THER2 (-120 to -87)  
**Element 2:** MWIR3 (-86 to +29)  
**Element 3:** MWIRb (+33 to +160)

## miR-421

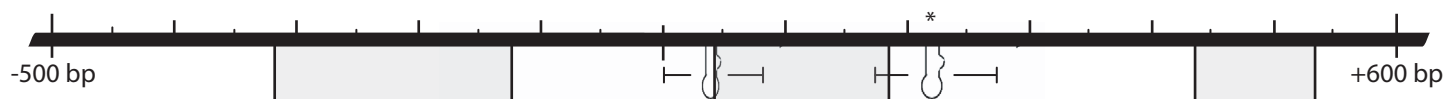

**Chromosomal Band:** Xq13.2  
**Base Positions:** 73354937-73355021  
**ENSEMBL Gene:** ENSG00000202566  
**Concurrent Transcripts:** \*miR-374-2<sup>b</sup> ENSG00000208026

**Censor Server Annotations (bp 5' to 3') :**  
**Element 1:** MER117 (-320 to -122)  
**Element 2:** LINE2B (+49 to +188)  
**Element 3:** MWIRb (+443 to +534)

## miR-422a

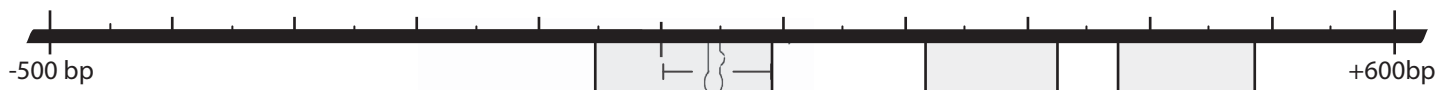

**Chromosomal Band:** 15q22.31  
**Base Positions:** 61950182-61950271  
**ENSEMBL Gene:** ENSG00000199156  
**Concurrent Transcripts:** -

**Censor Server Annotations (bp 5' to 3') :**  
**Element 1:** THER2 (-54 to +90)  
**Element 2:** MWIR (+222 to +322)  
**Element 3:** LINE2B (+367 to +488)

## miR-493

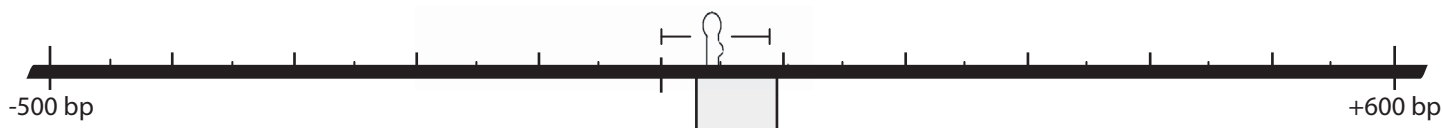

**Chromosomal Band:** 14q32.31  
**Base Positions:** 100405150-100405238  
**ENSEMBL Gene:** ENSG00000207989  
**Concurrent Transcripts:** Chr.14 miR cluster

**Censor Server Annotations (bp 5' to 3') :**  
**Element 1:** LINE2B (+32 to +91)

## miR-544

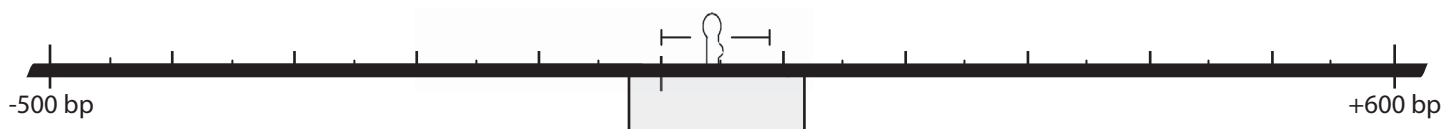

**Chromosomal Band:** 14q32.31  
**Base Positions:** 100584748-100584838  
**ENSEMBL Gene:** ENSG00000207587  
**Concurrent Transcripts:** Chr.14 miR cluster

**Censor Server Annotations (bp 5' to 3') :**  
**Element 1:** MER5A1 (-29 to +114)

miR-545 - see miR-374

## miR-548a-1

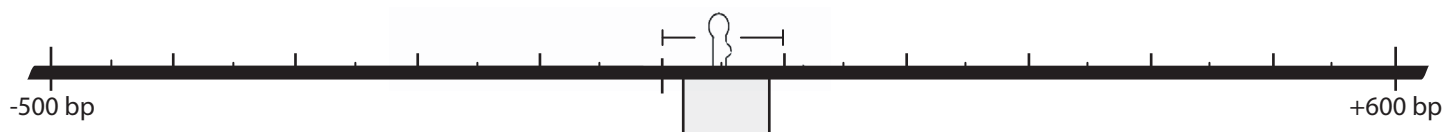

**Chromosomal Band:** 6p22.3  
**Base Positions:** 18679994-18680090  
**ENSEMBL Gene:** ENSG00000207775  
**Concurrent Transcripts:** -

**Censor Server Annotations (bp 5' to 3') :**  
**Element 1:** MADE1 (+13 to +87)

## miR-548a-2

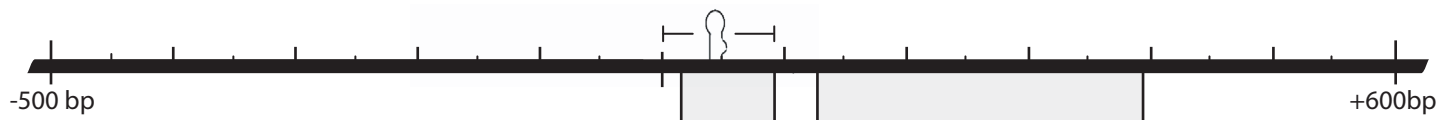

**Chromosomal Band:** 6q23.3  
**Base Positions:** 135601991-135602087  
**ENSEMBL Gene:** ENSG00000207689  
**Concurrent Transcripts:** -

**Censor Server Annotations (bp 5' to 3') :**  
**Element 1:** MADE1 (+12 to +92)  
**Element 2:** LTR16C (+128 to +390)

## miR-548a-3

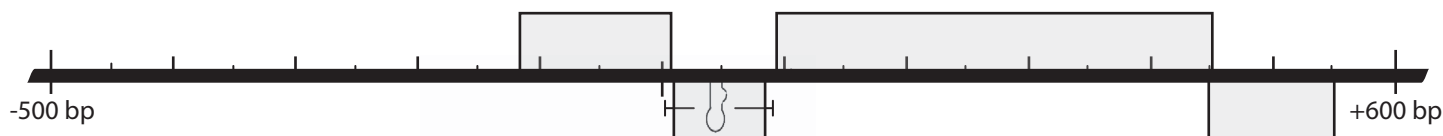

**Chromosomal Band:** 8q22.3  
**Base Positions:** 105565773-105565869  
**ENSEMBL Gene:** ENSG00000208032  
**Concurrent Transcripts:** -

**Censor Server Annotations (bp 5' to 3') :**  
**Element 1:** MLT1H1 (-115 to +5)  
**Element 2:** MADE1 (+6 to +85)  
**Element 3:** MLT1G1 (+97 to +453)  
**Element 4:** MWIRb(+455 to +551)

## miR-548b

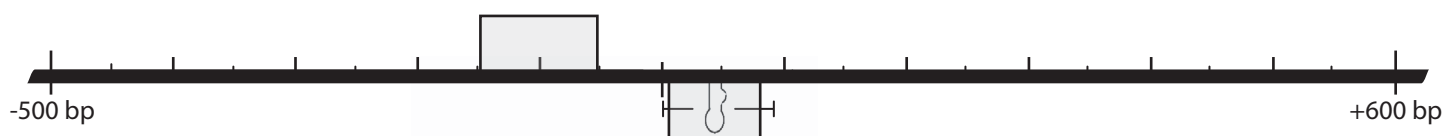

**Chromosomal Band:** 6q22.31  
**Base Positions:** 119431911-119432007  
**ENSEMBL Gene:** ENSG00000207982  
**Concurrent Transcripts:** C6ORF60 Intron

**Censor Server Annotations (bp 5' to 3') :**  
**Element 1:** BLOOD\_I (-148 to -49)  
**Element 2:** MADE1 (+6 to +85)

## miR-548c

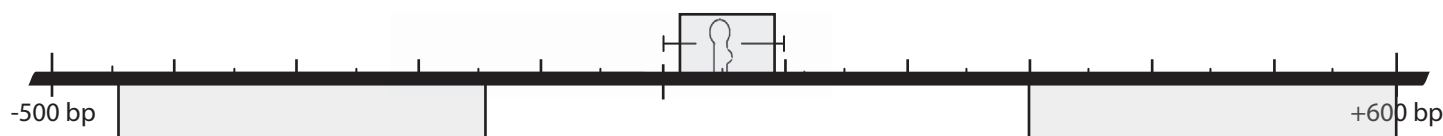

**Chromosomal Band:** 12q14.2  
**Base Positions:** 63302556-63302652  
**ENSEMBL Gene:** ENSG00000207546  
**Concurrent Transcripts:** RASSF3 Intron

**Censor Server Annotations (bp 5' to 3') :**  
**Element 1:** AluSg (-444 to -149)  
**Element 2:** MADE1 (+13 to +92)  
**Element 3:** AluSx (+304 to +597)

## miR-548d-1

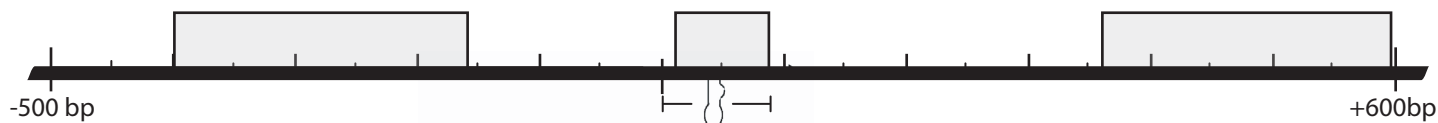

**Chromosomal Band:** 8q24.13  
**Base Positions:** 124429455-124429551  
**ENSEMBL Gene:** ENSG00000207704  
**Concurrent Transcripts:** ATAD2 Intron

**Censor Server Annotations (bp 5' to 3') :**  
**Element 1:** MWIR (-398 to -159)  
**Element 2:** MADE1 (+6 to +85)  
**Element 3:** AluSz (+362 to +597)

## miR-548d-2

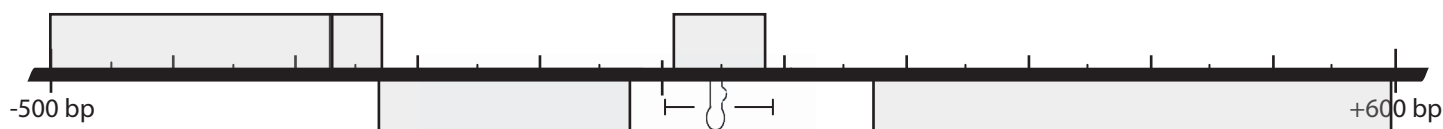

**Chromosomal Band:** 17q24.2  
**Base Positions:** 62898067-62898163  
**ENSEMBL Gene:** ENSG00000207688  
**Concurrent Transcripts:** -

**Censor Server Annotations (bp 5' to 3') :**  
**Element 1:** SVA (-499 to -278)  
**Element 2:** L1MB4\_5 (-277 to -232)  
**Element 3:** L1ME1 (-231 to -29)  
**Element 4:** MADE1 (+6 to +85)  
**Element 5:** L1MD3 (+174 to +596)

## miR-552

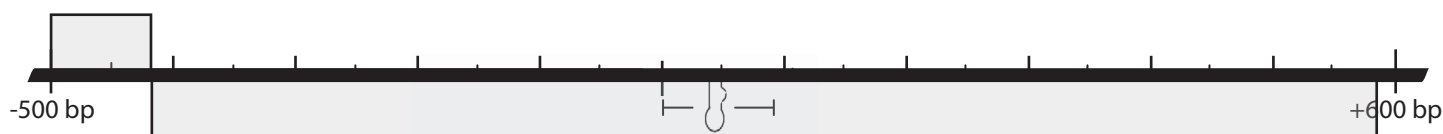

**Chromosomal Band:** 1p34.3  
**Base Positions:** 34907787-34907882  
**ENSEMBL Gene:** ENSG00000207941  
**Concurrent Transcripts:** -

**Censor Server Annotations (bp 5' to 3') :**  
**Element 1:** THE1B (-499 to -412)  
**Element 2:** L1MD2 (-410 to +587)

## miR-558

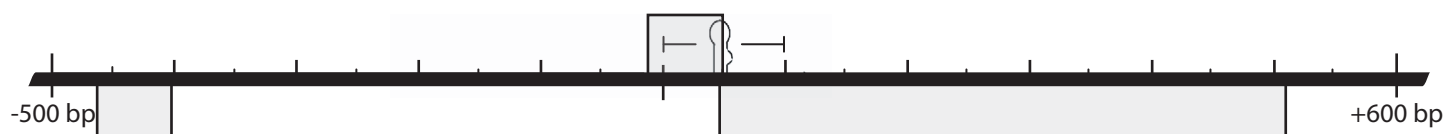

**Chromosomal Band:** 2p22.3  
**Base Positions:** 32610724-32610817  
**ENSEMBL Gene:** ENSG00000207653  
**Concurrent Transcripts:** BIRC6 Intron

**Censor Server Annotations (bp 5' to 3') :**  
**Element 1:** CER17-I\_CE (-464 to -398)  
**Element 1:** FUGUREP2 (-14 to +52)  
**Element 1:** MLT1C (+53 to +502)

## miR-562

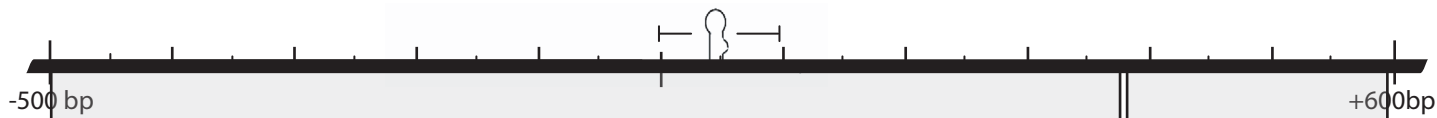

**Chromosomal Band:** 2q37.1  
**Base Positions:** 232745607-232745701  
**ENSEMBL Gene:** ENSG00000207626  
**Concurrent Transcripts:** Q8N9K9 Intron

**Censor Server Annotations (bp 5' to 3') :**  
**Element 1:** LINE1 (-499 to +375)  
**Element 2:** LINE1 (+379 to +593)

## miR-565

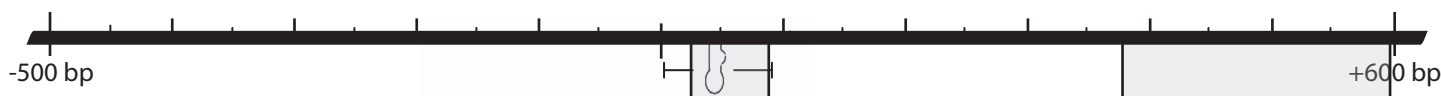

**Chromosomal Band:** 3p21.31  
**Base Positions:** 45705468-45705564  
**ENSEMBL Gene:** ENSG00000207593  
**Concurrent Transcripts:** ENSESTG00000004414

**Censor Server Annotations (bp 5' to 3') :**  
**Element 1:** PRE1\_SS (+29 to +94)  
**Element 2:** EnSpm2\_TM (+379 to +595)

## miR-566-1

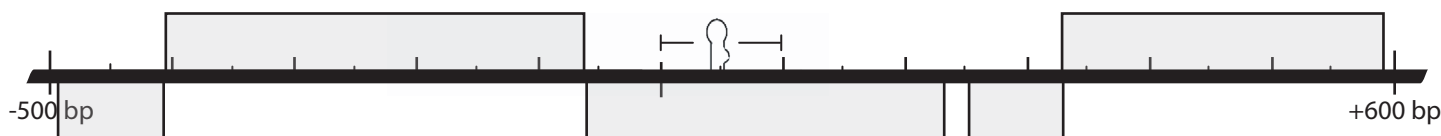

**Chromosomal Band:** 10q22.1  
**Base Positions:** 73665070-73665162  
**ENSEMBL Gene:** ENSG00000207919  
**Concurrent Transcripts:** C10ORF104 Intron

**Censor Server Annotations (bp 5' to 3') :**  
**Element 1:** L1-5\_DR (-493 to -405)  
**Element 2:** SVA (-404 to -69)  
**Element 3:** AluSx (-68 to +229)  
**Element 4:** MER57A\_I (+253 to +324)  
**Element 5:** AluSx (+325 to +594)

## miR-566-2

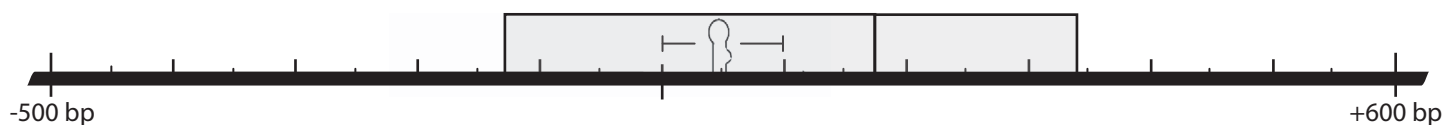

**Chromosomal Band:** 3p21.31  
**Base Positions:** 50185763-50185856  
**ENSEMBL Gene:** ENSG00000207922  
**Concurrent Transcripts:** SEMA3F Intron

**Censor Server Annotations (bp 5' to 3') :**  
**Element 1:** AluSg (-133 to +170)  
**Element 2:** AluJb (+171 to +346)



## miR-568

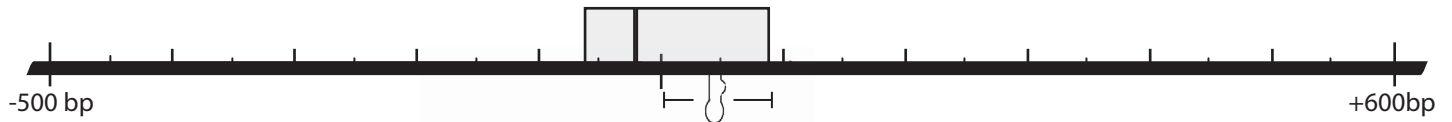

**Chromosomal Band:** 3q13.31  
**Base Positions:** 115518012-115518106  
**ENSEMBL Gene:** ENSG00000207770

**Concurrent Transcripts:** -

**Censor Server Annotations (bp 5' to 3') :**  
**Element 1:** ERVL (-61 to -20)  
**Element 2:** SPMLIKE (-19 to +93)

## miR-570

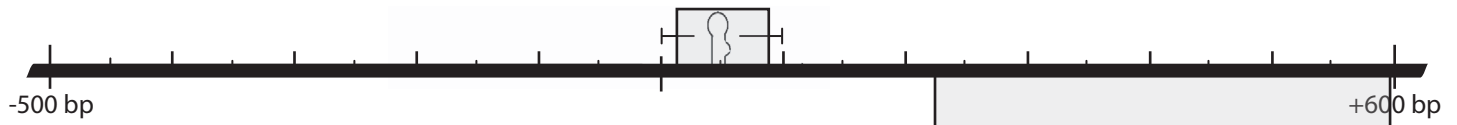

**Chromosomal Band:** 3q29  
**Base Positions:** 196911452-196911548  
**ENSEMBL Gene:** ENSG00000207650

**Concurrent Transcripts:** -

**Censor Server Annotations (bp 5' to 3') :**  
**Element 1:** MADE1 (+13 to +91)  
**Element 2:** EnSpm2\_TM (+243 to +595)

## miR-576

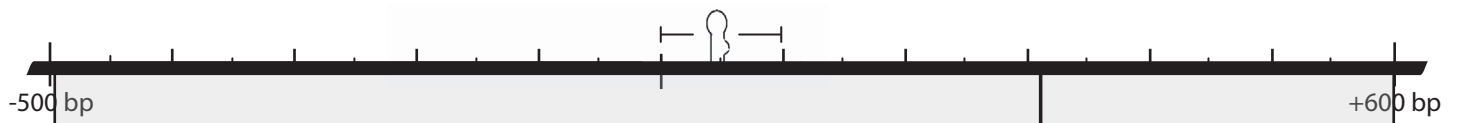

**Chromosomal Band:** 4q25  
**Base Positions:** 110629303-110629400  
**ENSEMBL Gene:** ENSG00000207988

**Concurrent Transcripts:** SEC24B Intron

**Censor Server Annotations (bp 5' to 3') :**  
**Element 1:** LINE1 (-493 to +302)  
**Element 2:** LINE1 (+307 to +598)

## miR-579

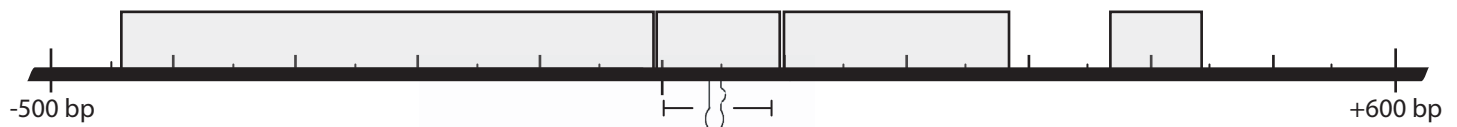

**Chromosomal Band:** 5p13.3  
**Base Positions:** 32430241-32430338  
**ENSEMBL Gene:** ENSG00000207956

**Concurrent Transcripts:** ZFR Intron

**Censor Server Annotations (bp 5' to 3') :**  
**Element 1:** LINE1 (-447 to -4)  
**Element 2:** MADE1 (-2 to +94)  
**Element 3:** LINE1 (+95 to +291)  
**Element 4:** CR1 (+368 to +448)

## miR-584

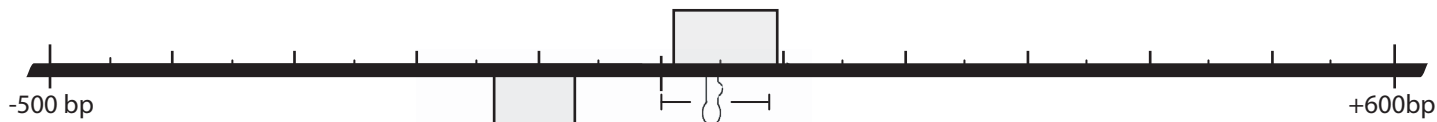

**Chromosomal Band:** 5q32  
**Base Positions:** 148422069-148422165  
**ENSEMBL Gene:** ENSG00000207714  
**Concurrent Transcripts:** SH3TC2 Intron

**Censor Server Annotations (bp 5' to 3') :**  
**Element 1:** LINE1 (-143 to -68)  
**Element 2:** MER81 (+9 to +97)

## miR-588

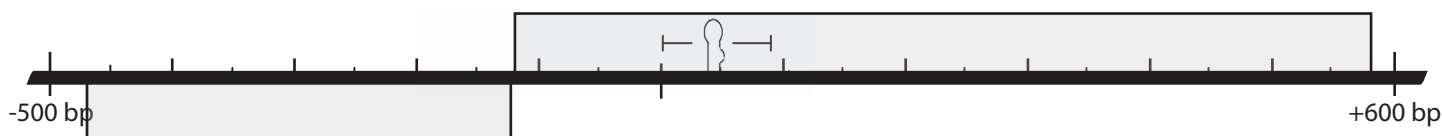

**Chromosomal Band:** 6q22.32  
**Base Positions:** 126847470-126847552  
**ENSEMBL Gene:** ENSG00000207632  
**Concurrent Transcripts:** -

**Censor Server Annotations (bp 5' to 3') :**  
**Element 1:** LINE1 (-465 to -120)  
**Element 2:** LINE1 (-119 to +583)

## miR-591

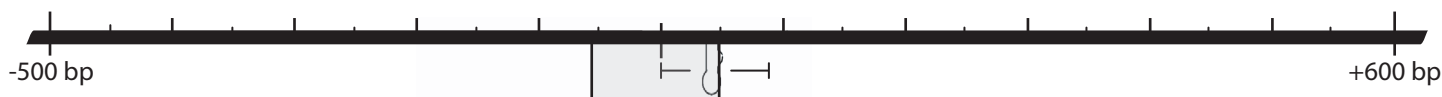

**Chromosomal Band:** 7q21.3  
**Base Positions:** 95686910-95687004  
**ENSEMBL Gene:** ENSG00000208025  
**Concurrent Transcripts:** SLC25A13 Intron

**Censor Server Annotations (bp 5' to 3') :**  
**Element 1:** MER5A (-53 to +48)

## miR-594

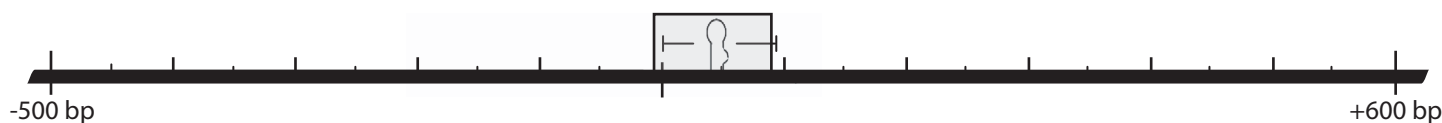

**Chromosomal Band:** 7q34  
**Base Positions:** 138675997-138676085  
**ENSEMBL Gene:** ENSG00000207796  
**Concurrent Transcripts:** ENSESTG00000018887 Intron

**Censor Server Annotations (bp 5' to 3') :**  
**Element 1:** TC4 (-6 to +85)

## miR-603

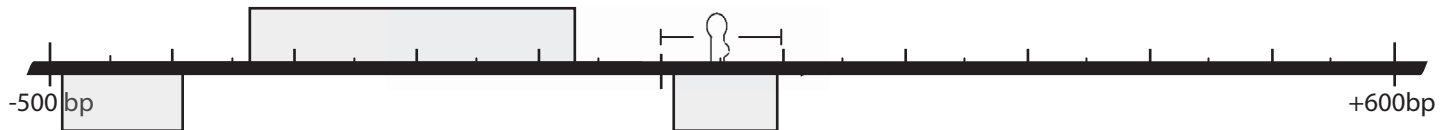

**Chromosomal Band:** 10p12.1  
**Base Positions:** 24604620-24604716  
**ENSEMBL Gene:** ENSG00000207930  
**Concurrent Transcripts:** Q5T5P2 Intron

**Censor Server Annotations (bp 5' to 3') :**  
**Element 1:** MEN (-489 to -392)  
**Element 2:** MER82 (-338 to -66)  
**Element 3:** MADE1 (+12 to +92)

## miR-606

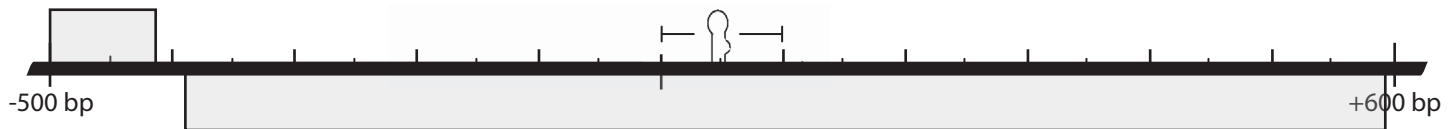

**Chromosomal Band:** 10q22.2  
**Base Positions:** 76982222-76982317  
**ENSEMBL Gene:** ENSG00000207583  
**Concurrent Transcripts:** C10ORF11 Intron

**Censor Server Annotations (bp 5' to 3') :**  
**Element 1:** AluJb (-499 to -416)  
**Element 2:** LINE1 (-386 to +594)

## miR-607

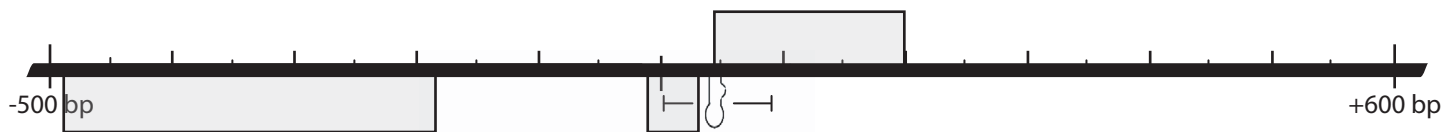

**Chromosomal Band:** 10q24.1  
**Base Positions:** 98578416-98578511  
**ENSEMBL Gene:** ENSG00000207976  
**Concurrent Transcripts:** -

**Censor Server Annotations (bp 5' to 3') :**  
**Element 1:** AluSz (-489 to -194)  
**Element 2:** MWIR (-11 to +26)  
**Element 3:** MWIR (+43 to +198)

## miR-616

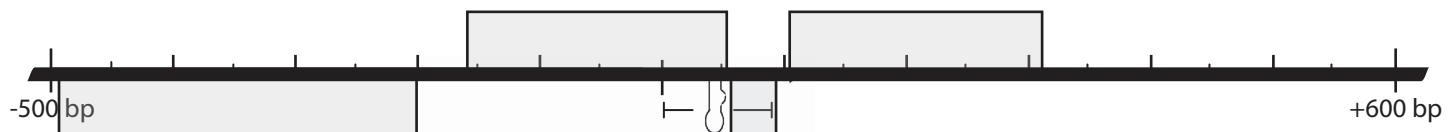

**Chromosomal Band:** 12q13.3  
**Base Positions:** 56199213-56199309  
**ENSEMBL Gene:** ENSG00000208028  
**Concurrent Transcripts:** DDIT3 Intron

**Censor Server Annotations (bp 5' to 3') :**  
**Element 1:** AluSq (-496 to -203)  
**Element 2:** LINE2A (-157 to +52)  
**Element 3:** LINE2A (+59 to +93)  
**Element 4:** LINE2A (+103 to +313)

## miR-619

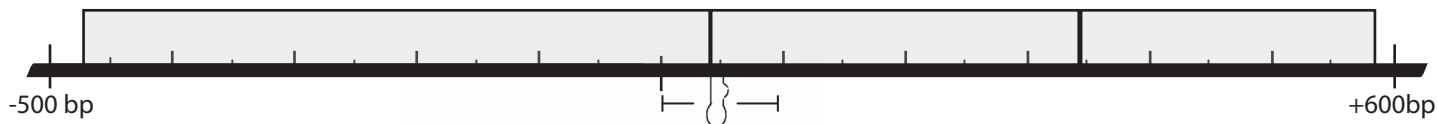

**Chromosomal Band:** 12q24.11  
**Base Positions:** 107754813-107754911  
**ENSEMBL Gene:** ENSG00000207622  
**Concurrent Transcripts:** SSH1 Intron

**Censor Server Annotations (bp 5' to 3') :**  
**Element 1:** LINE1MC4 (-474 to +41)  
**Element 2:** AluSz (+42 to +348)  
**Element 3:** LINE1MC4 (+349 to +588)

## miR-625

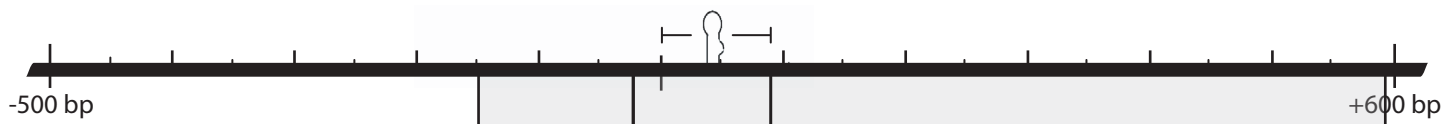

**Chromosomal Band:** 14q23.3  
**Base Positions:** 65007573-65007657  
**ENSEMBL Gene:** ENSG00000207781  
**Concurrent Transcripts:** FUT8 Intron

**Censor Server Annotations (bp 5' to 3') :**  
**Element 1:** LINE1MC (-150 to -32)  
**Element 1:** LINE1MC (-31 to +94)  
**Element 1:** LINE1MC (+95 to +583)

## miR-626

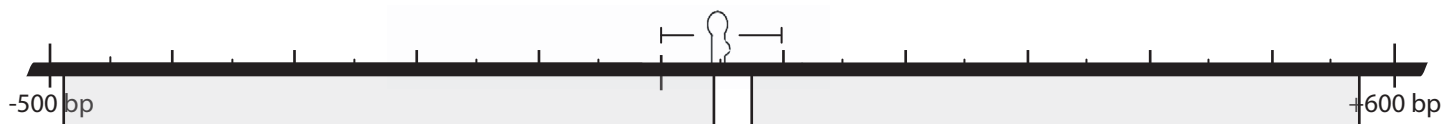

**Chromosomal Band:** 15q15.1  
**Base Positions:** 39771075-39771168  
**ENSEMBL Gene:** ENSG00000207766  
**Concurrent Transcripts:** MGA Intron

**Censor Server Annotations (bp 5' to 3') :**  
**Element 1:** LINE1 (-496 to +42)  
**Element 2:** LINE1MC (+77 to +568)

## miR-633

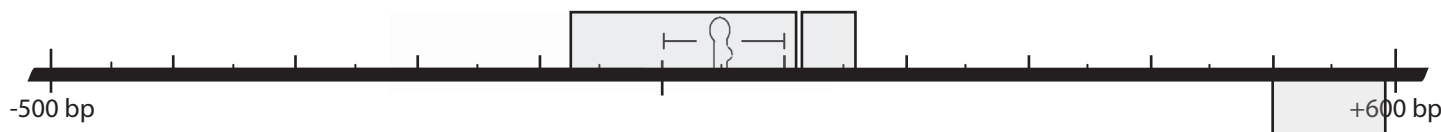

**Chromosomal Band:** 17q23.3  
**Base Positions:** 58375308-58375405  
**ENSEMBL Gene:** ENSG00000207552  
**Concurrent Transcripts:** -

**Censor Server Annotations (bp 5' to 3') :**  
**Element 1:** AluSq (-72 to +108)  
**Element 2:** THER1 (+115 to +155)  
**Element 3:** LINE2A (+501 to +598)

## miR-637

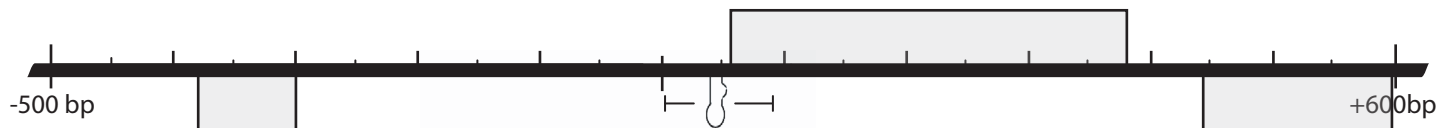

**Chromosomal Band:** 19p13.3  
**Base Positions:** 3912412-3912510  
**ENSEMBL Gene:** ENSG00000207733  
**Concurrent Transcripts:** DAPK3 Intron

**Censor Server Annotations (bp 5' to 3') :**  
**Element 1:** SC-3 (-376 to -300)  
**Element 2:** LINE1MC4 (+62 to +386)  
**Element 3:** AluY (+449 to +596)

## miR-638

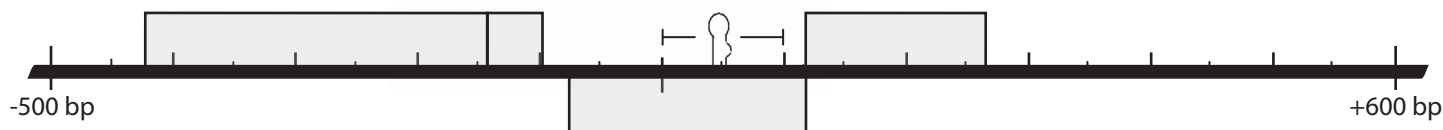

**Chromosomal Band:** 19p13.2  
**Base Positions:** 10690080-10690179  
**ENSEMBL Gene:** ENSG00000207972  
**Concurrent Transcripts:** DNMT2 Intron

**Censor Server Annotations (bp 5' to 3') :**  
**Element 1:** MERMITE18c (-420 to -146)  
**Element 2:** OSTE15 (-145 to -100)  
**Element 3:** AC9 (-74 to +112)  
**Element 4:** SABRINA1 (+113 to +266)

## miR-640

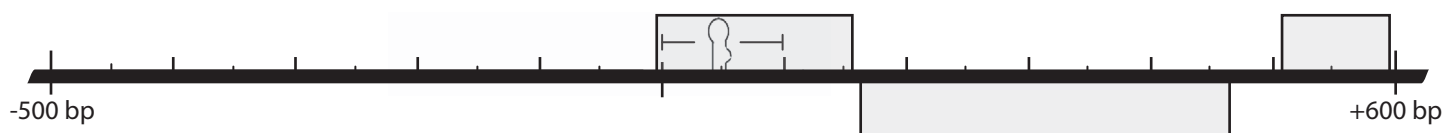

**Chromosomal Band:** 19p13.11  
**Base Positions:** 19406872-19406967  
**ENSEMBL Gene:** ENSG00000207821  
**Concurrent Transcripts:** GATAD2A Intron

**Censor Server Annotations (bp 5' to 3') :**  
**Element 1:** THER1 (-4 to +159)  
**Element 2:** AluJb (+169 to +462)  
**Element 3:** AluSq (+506 to +596)

## miR-649

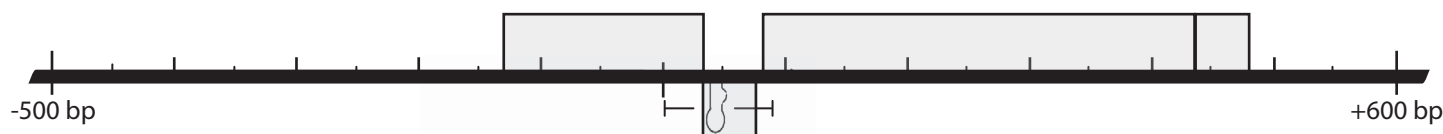

**Chromosomal Band:** 22q11.21  
**Base Positions:** 19718465-19718561  
**ENSEMBL Gene:** ENSG00000207575  
**Concurrent Transcripts:** -

**Censor Server Annotations (bp 5' to 3') :**  
**Element 1:** LINE1 (-126 to +32)  
**Element 2:** MER8 (+33 to +73)  
**Element 3:** AluSz (+89 to +431)  
**Element 4:** LINE1 (+432 to +473)

## miR-652

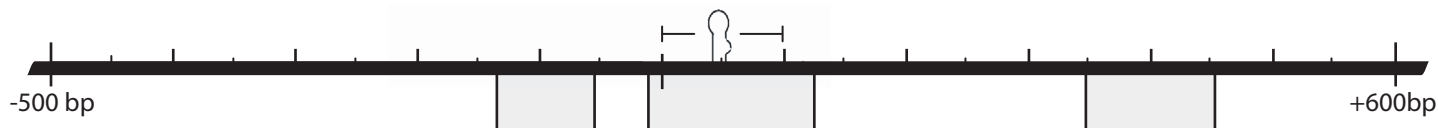

**Chromosomal Band:** Xq23  
**Base Positions:** 109185213-109185310  
**ENSEMBL Gene:** ENSG00000208013  
**Concurrent Transcripts:** Q9H617 Intron

**Censor Server Annotations (bp 5' to 3') :**  
**Element 1:** BOVB (-142 to -61)  
**Element 2:** MER91C (-9 to +118)  
**Element 3:** LINE2B (+348 to +452)

## miR-297-1<sup>c</sup>

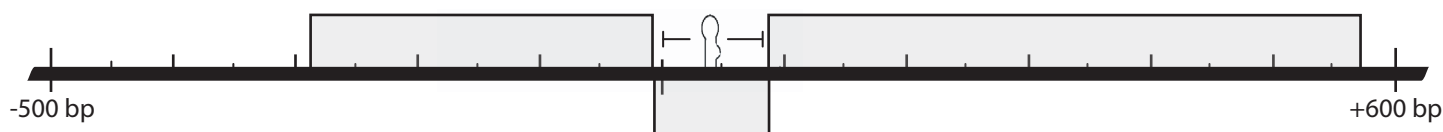

**Chromosomal Band:** 12p12.1  
**Base Positions:** 24038064-240381481  
**ENSEMBL Gene:** ENSG00000207823  
**Concurrent Transcripts:** -

**Censor Server Annotations (bp 5' to 3') :**  
**Element 1:** AluSz (-276 to -3)  
**Element 2:** Gypsy2 (-2 to +76)  
**Element 3:** LINE1 (+77 to +569)

## miR-297-2<sup>c</sup>

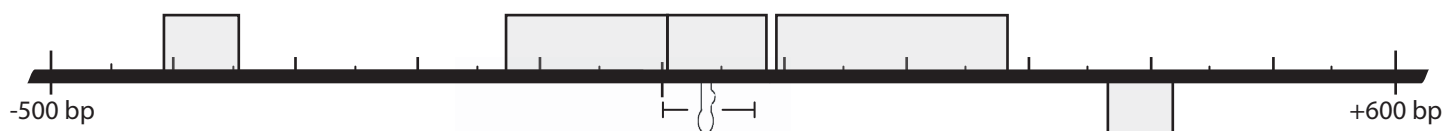

**Chromosomal Band:** 12p13.31  
**Base Positions:** 5943647-5943729  
**ENSEMBL Gene:** ENSG00000207822  
**Concurrent Transcripts:** VWF Intron

**Censor Server Annotations (bp 5' to 3') :**  
**Element 1:** THER1 (-406 to -348)  
**Element 2:** AluJb (-120 to +3)  
**Element 3:** DM1731 (+4 to +85)  
**Element 4:** AluJb (+93 to +288)  
**Element 5:** LTR92 (+360 to +414)

## miR-297-3<sup>c</sup>

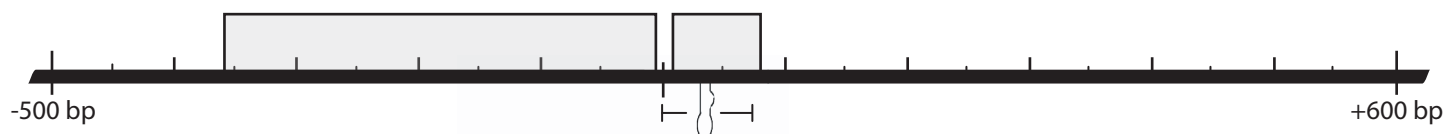

**Chromosomal Band:** 10q23.2  
**Base Positions:** 88046488-88046570  
**ENSEMBL Gene:** ENSG00000207824  
**Concurrent Transcripts:** GRID1 Intron

**Censor Server Annotations (bp 5' to 3') :**  
**Element 1:** AluYa1 (-292 to +1)  
**Element 2:** Polinton1 (+2 to +81)
