# Supplementary material for: RNA polymerase III transcribes human microRNAs
Source: Springer Nature journal article supplement (doi:10.1038/nsmb1167), 2006-11-12
Supplement: 41594_2006_BFnsmb1167_MOESM3_ESM.pdf [file 41594_2006_BFnsmb1167_MOESM3_ESM.pdf]

| Clone # | microRNA   | Length(bp) | % Identity |
|---------|------------|------------|------------|
| 1       | miR-517b   | 183        | 99.2       |
| 10      | miR-519d   | 510        | 99.4       |
| 11      | miR-519a-2 | 511        | 99.4       |
| 12      | miR-519b   | 509        | 99.4       |
| 13      | miR-519d   | 510        | 99.4       |
| 14      | miR-519a-2 | 510        | 99.4       |
| 15      | miR-519a-2 | 331        | 98.7       |
| 16      | miR-526a-1 | 329        | 99.7       |
| 18      | miR-519a-2 | 331        | 99.1       |
| 19      | miR-526a-1 | 329        | 97.7       |
| 20      | miR-519c   | 268        | 97.6       |
| 21      | miR-522    | 331        | 98.2       |
| 22      | miR-519c   | 268        | 98.8       |
| 23      | miR-519c   | 260        | 98.4       |
| 24      | miR-526a-1 | 327        | 98.2       |
| 25      | miR-519c   | 267        | 98.8       |
| 26      | miR-519b   | 279        | 98.2       |
| 27      | miR-519c   | 172        | 100        |
| 28      | miR-519a-1 | 330        | 97.6       |
| 29      | miR-519a-1 | 332        | 97.8       |
| 51      | miR-520b   | 476        | 98.7       |
| 53      | miR-520b   | 476        | 98.5       |
| 54      | miR-519b   | 470        | 99.4       |

**SupplementaryTable 2.** Identification of C19MC ESTs. Reverse transcription of RNA harvested from 293Ts was performed at 65° C using a C19MC pre-miRNA degenerate primer. PCRs using the initial degenerate primer (reverse) based on pre-miRNA alignments and a degenerate miR-517 or -519 primer (forward) based on sequences 5' of these pre-miR families were cloned in batch, and individual colonies sequenced (Clone #). In all, 23 clones (representing nine distinct C19MC miRNA loci) corresponded to a C19MC transcript terminating (3') within a C19MC pre-miRNA and originating (5') of the pre-miRNA. Length and % Identity refer to an alignment between an individual clone and the specific miR locus indicated. The % Identity was calculated as # identical basepairs / alignment length.
