# Supplementary material for: RNA polymerase III transcribes human microRNAs
Source: Springer Nature journal article supplement (doi:10.1038/nsmb1167), 2006-11-12
Supplement: 41594_2006_BFnsmb1167_MOESM6_ESM.pdf [file 41594_2006_BFnsmb1167_MOESM6_ESM.pdf]

## Vector Constructs

---

|               |                                                                                  |
|---------------|----------------------------------------------------------------------------------|
| 517aF         | TGGGCGGCAGAGTGAGACTCCGTGTCAAAAAAAAAAGAAGATCTCAGGCAGTGACCCCTAGATGGAAGCACTGTCTGTG  |
| 517aR         | AAAAAGCTTGCTCTCAAACAGTAACACTCTAAAGGGATGCACGATCTTTCTTTTATACAACAGACAGTGCTTCCATCTAG |
| 517cF         | TGATTTGCTGTTTAGGTGTGGGCATCTTTTTTGTTCCTAATTTTAAGTATAGGACAA                        |
| 517cR         | GTGCTTCCATCTAGAGGGTCACATGCCTGAGATCTTCTTGTCTCCAGTACTCTGGG                         |
| flaczRrtpcr   | AAAAAAACGAATTTCTGCAGATATCCATC                                                    |
| rlaczRrtpcr   | AAAAAAACGTGACCTATCCATTACGTGACAGGAA                                               |
| Lacz_targ_f   | TTCTCGAGCGGTTACGATGCGCCCATCTACACCAACGTGACCTATCCATTACGGTCAA                       |
| Lacz_targ_r   | AAGCGCCCGGGGAACAACCGCGGATTGACCGTAATGGGATAGGTCACGTTGGTGT                          |
| 517a targ f   | AACTCGAGAACACTCTAAAGGGATGCACGATAAAACACTCTAAAGGGATGCA                             |
| 517a targ r   | AAGCGCCCGCATCGTGCATCCCTTTAGAGTGTTTTATCGTGCATCCCTTTAGAGTGTTTT                     |
| Shlacz_topo_R | AAAAAAACGTGACCTATCCATTACGTGACAGGAAGCGTAATGGGATAGGTCACGTTGATGGATATCTGCAGAATTCG    |

## C19MC EST Cloning

---

|            |                             |
|------------|-----------------------------|
| ch19f517   | AGAATSKCTTGAACCC            |
| ch19fother | GCTGTTCTCTAGAAATYCAGCC      |
| ch19R      | CAACAGAMAGYGCTTCCMTSTAGAGGG |

## Small transcript northern

---

|                |                                                                                                           |
|----------------|-----------------------------------------------------------------------------------------------------------|
| Bio100mer      | Biotin-GGGCCGAGTGAGGAGAATAACATCACGAGTCCGGCGGCACGGAGTGGAGCAAGCGTGACAAGTCCACGTATGACCCGACCGACGATATCGAAGCCTAC |
| Bio18mer       | Biotin-GCAAGCGTGACAAGTCCACG                                                                               |
| Bio50mer       | Biotin-GCAAGCGTGACAAGTCCACGTATGACCCGACCGACGATATCGAAGCCTAC                                                 |
| Bio75mer       | Biotin-ACGAGTCCGGCGGCACGGAGTGGAGCAAGCGTGACAAGTCCACGTATGACCCGACCGACGATATCGAAGCCTAC                         |
| biomir517      | Biotin-TAACACTCTAAAGGGATGCACGATC                                                                          |
| bioshlacz      | Biotin-CCACGTGACCTATCCATTACGGT                                                                            |
| mir517anti     | AACACTCTAAAGGGATGCACGA                                                                                    |
| Shlacz_topo_5_ | TTTTTTTTGCACTGGATAGGGTAATGCACTGTCTTCGCATTACCCCTATCCAGTGCAACGGCCGCCAGTGTGCTGG                              |

## ChIP

---

|            |                                                                                  |
|------------|----------------------------------------------------------------------------------|
| poliii21f  | CTAAGTGCCACCAGACAGAAGGACC                                                        |
| poliii21r  | CCACCTTGTCGGGTAGCTTATCAGAC                                                       |
| gapdhF     | TCCACCACCCGTGTGCTGTA                                                             |
| gapdhR     | ACCACAGTCCATGCCATCAC                                                             |
| trna-glu-F | AAGGCGCATCTCTAGTTTCAGTGG                                                         |
| trna-glu-R | AAACAGGAACGGTGTGTCGTGAG                                                          |
| 515F       | TTGAGATGGAGTCTTACTCTTGCCAGTCTGGAGTGCAGTGGCAGATCTCGGCTCACTGC                      |
| 515R       | AGTGCTTTCTTTTGGAGAATGACTGCATGAGATCTTCTCACTCCAAAACCTCTGGG                         |
| 106f       | TTTCTCGAGCCCTGCTGGCTATCCTGCGCCTTTCC                                              |
| 106r       | AAACTAGTAGTTTGGAGCCCCAGGACTGAGGTCC                                               |
| 517af      | TGGGCGGCAGAGTGAGACTCCGTGTCAAAAAAAAAAGAAGATCTCAGGCAGTGACCCCTAGATGGAAGCACTGTCTGTG  |
| 517ar      | AAAAAGCTTGCTCTCAAACAGTAACACTCTAAAGGGATGCACGATCTTTCTTTTATACAACAGACAGTGCTTCCATCTAG |
| 519a1f     | GCCTGTGGTCTGTCTGGAGGATGTTTGTGTGTGTGACAATG                                        |
| 519a1r     | TTTTTTACTAGTGCCCAACATCATCCAAGTCTGATTATAAGCATTCGCTGCAAATTTATTACCAAGATCAGCATCAGC   |

---

**Supplementary Table 5.** Oligonucleotide master list. All oligonucleotides were synthesized commercially (Integrated DNA Technologies, Coralville, IA) at either 25 or 100 nM scale.) “Ch19” refers to the C19MC. “21”, “515”, “517”, “519” and “106” refer to human miRNAs. “Targ” refers to a siRNA or miRNA antisense. “Topo” refers to the Topo-TA 2.1 vector (Invitrogen, Carlsbad, CA).
